# Supplementary material for: Prophage exotoxins enhance colonization fitness in epidemic scarlet fever-causing Streptococcus pyogenes
Source: PubMed Central journal article supplement (PMC7538557; doi:10.1038/s41467-020-18700-5), 2020-10-06
Supplement: 41467_2020_18700_MOESM1_ESM.pdf [file 41467_2020_18700_MOESM1_ESM.pdf]

## Supplementary Information

**Prophage exotoxins enhance colonization fitness in epidemic scarlet fever-causing *Streptococcus pyogenes***

Brouwer et al.

## Methods

### Construction of reporter strains

The plasmid-based reporter system (pLZ12Km2-P23R:TA, Addgene plasmid gift from Associate Professor Thomas Proft, University of Auckland, New Zealand) described in<sup>1</sup> was used to construct plasmid pLZ12Km2-P23R:TA:GFP. Maintenance plasmid pUC57-RBSGFP containing the ribosomal binding site (RBS) and *gfp* gene from pDCerm-GFP<sup>2</sup> was synthesized commercially by Genscript. pLZ12Km2-P23R:TA was digested with *NotI*, and pUC57-RBSGFP was incubated with *NotI* to excise the RBS and *gfp* gene from pUC57-RBSGFP. The excised RBS and *gfp* were then ligated into digested pLZ12km2-P23R:TA to generate pLZ12Km2-P23R:TA:GFP, which was used for transformation of electrocompetent HKU16 cells.

## Supplementary Figures

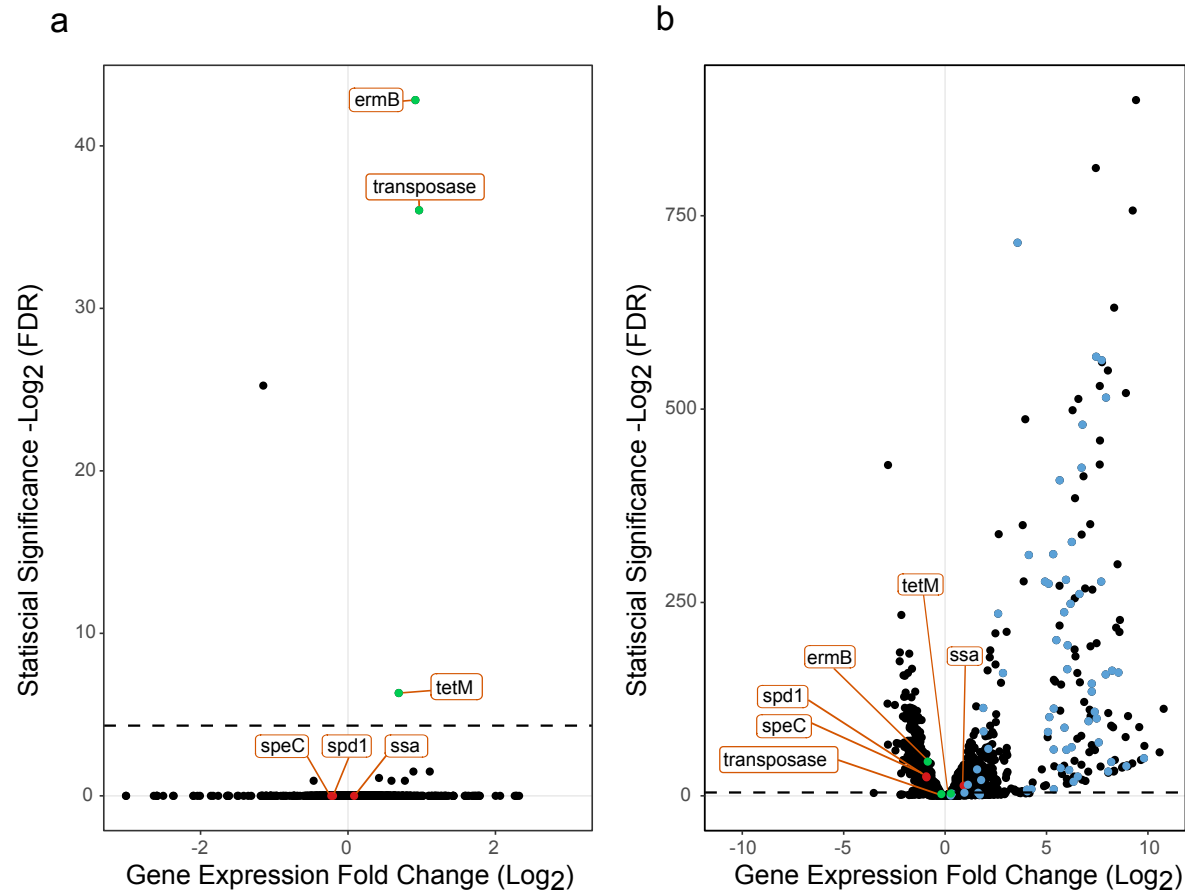

**Supplementary Figure 1:** Global transcriptional changes in HKU16 in response to antibiotic treatment stress. RNA-seq transcriptomes of *S. pyogenes emm12* strain HKU16 grown in THY medium compared with (a) THY supplemented with 2 µg/ml erythromycin and (b) THY

supplemented with 0.2  $\mu\text{g/ml}$  mitomycin C. Volcano plots represent differentially expressed genes of erythromycin or mitomycin C supplemented cultures relative to cultures grown in THY medium alone. Each dot represents a gene expression fold change (horizontal axis) with respect to statistical significance (vertical axis). Genes relating to prophage  $\phi\text{HKU.vir}$  virulence factors (red dots) and ICE-HKU*emm12* genes (green dots) are annotated as indicated using orange boxes. Genes corresponding to prophage  $\Phi\text{HKU.vir}$  genes are colored blue in **(b)**. Dashed line indicates a false discovery rate (FDR) of  $-\text{Log}_2 0.05$ .

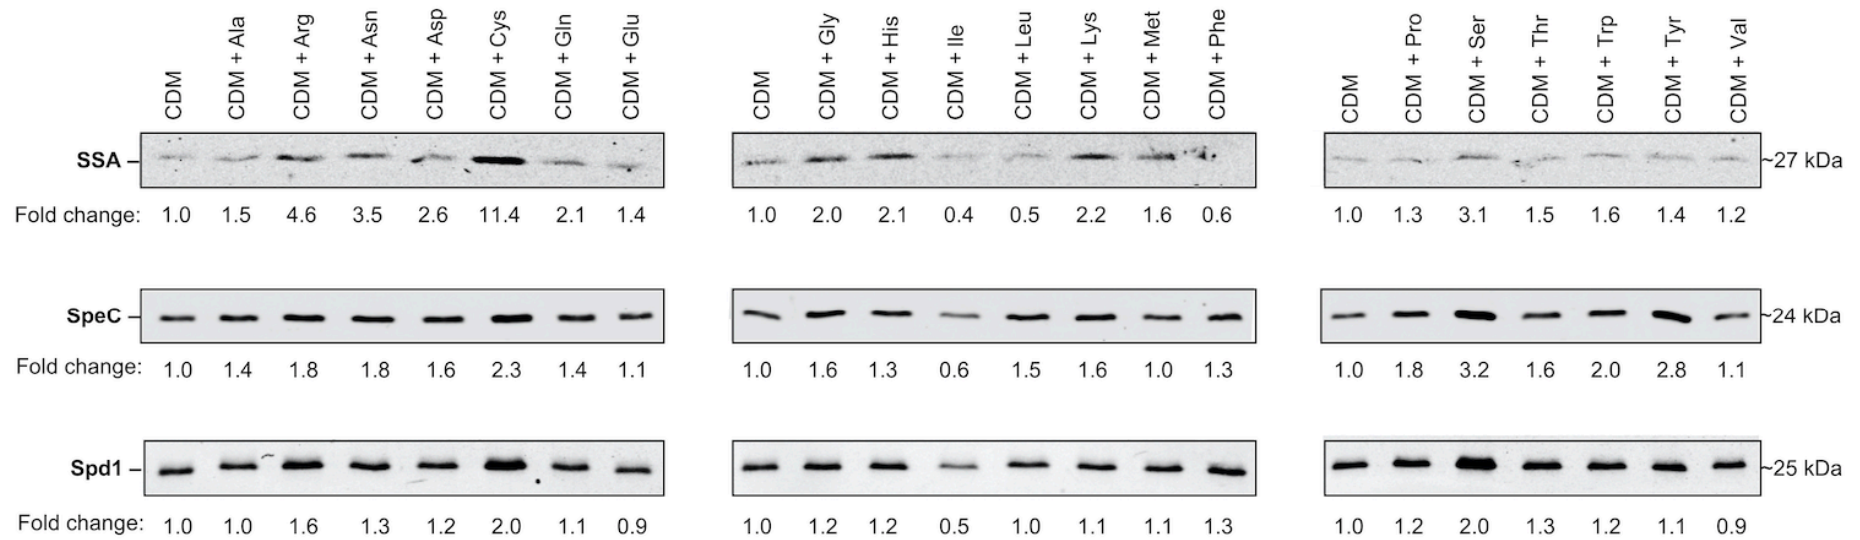

**Supplementary Figure 2:** Small molecule screen of all 20 amino acids used to identify cysteine as a factor specifically enhancing release of the exotoxin SSA by HKU16 grown in chemically defined medium (CDM) (n = 1). Conditions with a value greater than or equal to a cut-off value of 5-fold were selected for further analyses. Western blot signal intensities were quantified with ImageJ. Source data are provided as a Source Data file.

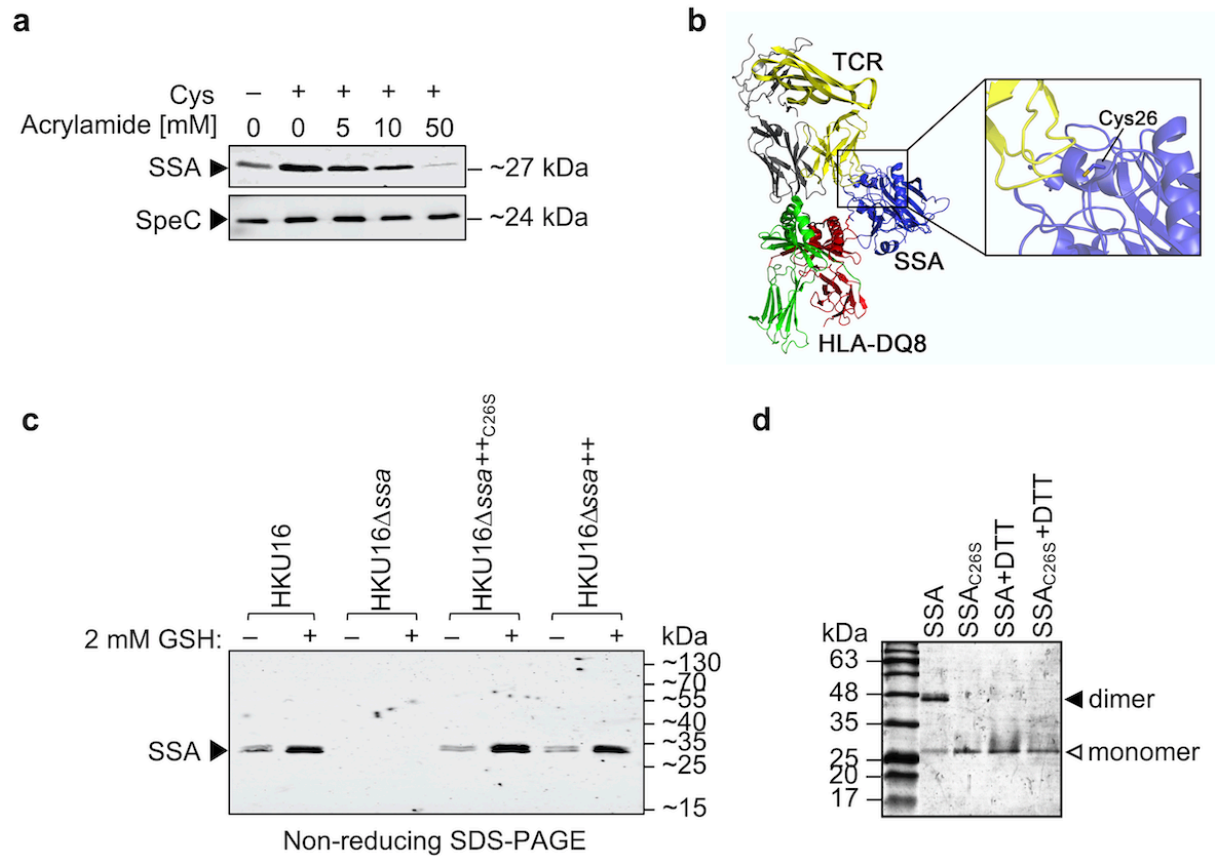

**Supplementary Figure 3:** Thiol-mediated regulation of the superantigen SSA. **(a)** Western immunoblot detection of secreted SSA and SpeC after supplementation of CDM with 2 mM Cys pre-treated with increasing concentrations of acrylamide ( $n = 1$ ). **(b)** Ribbon diagram representation of the modelled SSA-mediated T cell activation complex. The model was generated by superposition of the SSA (PDB 1BXT)<sup>3</sup> and HLA-DQ8 (PDB 1JK8)<sup>4</sup> crystal structures onto the co-crystal of SpeA in complex with TCR $\beta$  (PDB 1L0Y) and the co-crystal of SEB in complex with HLA-DR4

(PDB 1SEB)<sup>5</sup>. Colors are as follows: SSA, *blue*; TCR  $\beta$ -chain *yellow*; TCR  $\alpha$ -chain *grey*; MHC  $\alpha$ -chain, *red*; MHC  $\beta$ -chain, *green*. The inset highlights the location of the free Cys26 within the TCR-SSA interface. The image was generated using the PyMOL Molecular Graphics System, version 1.3 Schrödinger ([www.pymol.org/](http://www.pymol.org/)). **(c)** Immunoblot detection of SSA secreted by indicated HKU16 strains grown in CDM supplemented with 2 mM of GSH following non-reducing SDS-PAGE (n = 1). **(d)** PAGE profile (lacking SDS and samples were not boiled) of purified WT SSA and mutant SSA<sub>C26S</sub> under non-reducing and reducing conditions, respectively (n =1). Source data are provided as a Source Data file.

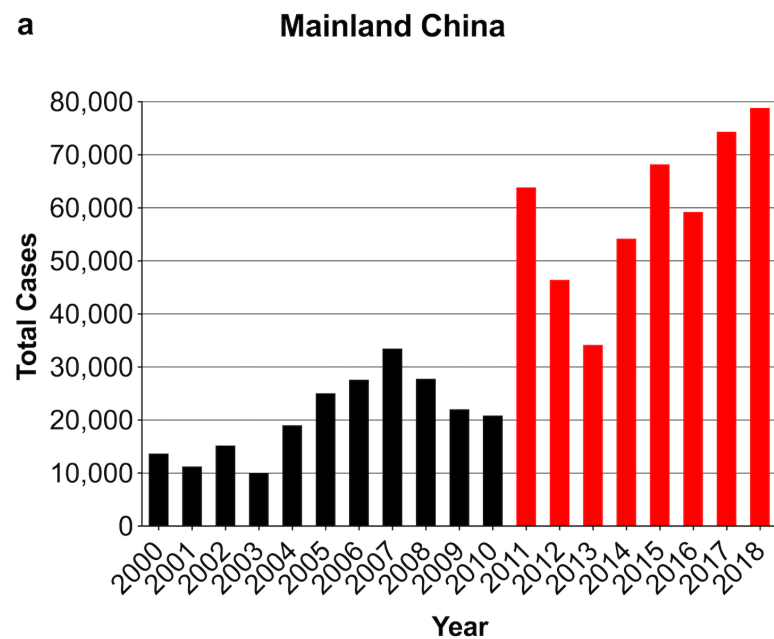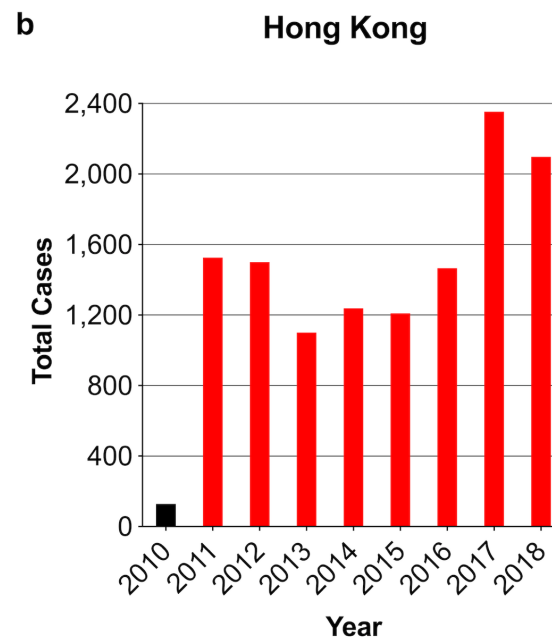

**Supplementary Figure 4:** Annual reported scarlet fever cases in (a) Mainland China and (b) Hong Kong. Data were obtained from the National Bureau of Statistics of China (<http://data.stats.gov.cn>; accessed August 20, 2019), and from the Hong Kong Centre for Health Protection website (<http://www.chp.gov.hk/en/notifiable1/10/26/43.html>; August 20, 2019), respectively. Ongoing resurgence of scarlet fever is highlighted in red.



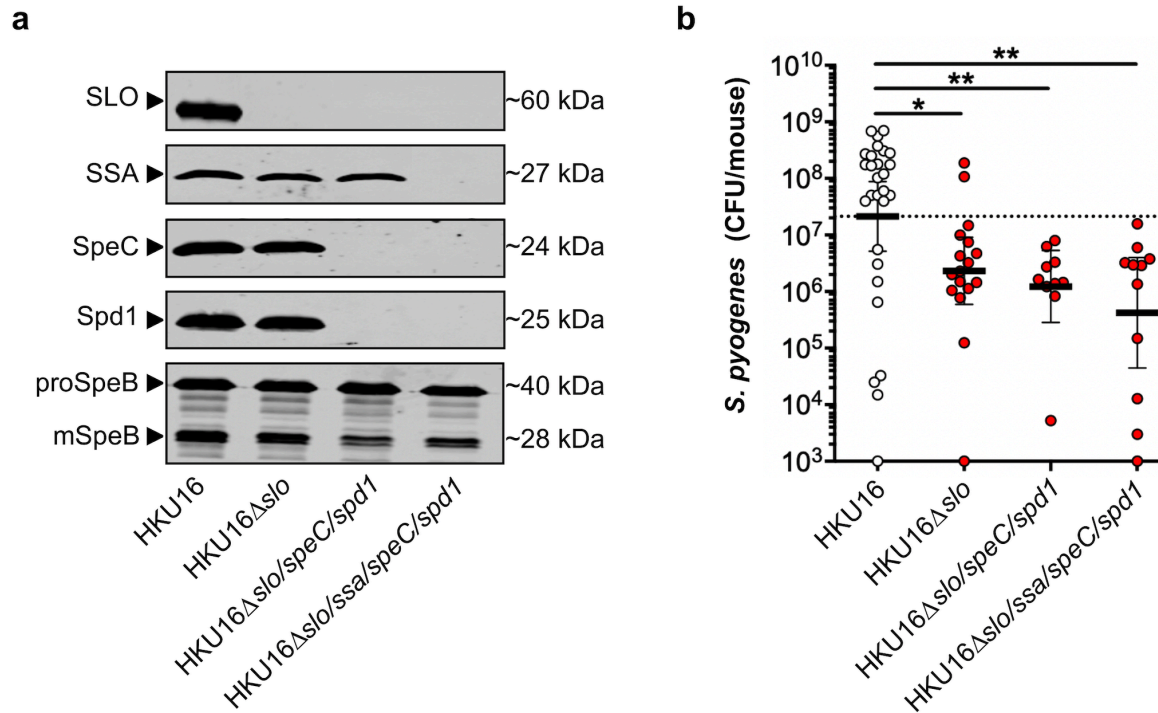

**Supplementary Figure 5:** Effect of combinations of SLO and  $\Phi$ HKU.vir-encoded exotoxin mutations on the nasopharyngeal colonization fitness of HKU16. **(a)** Immunoblot detection of SLO, SSA, SpeC, Spd1 and SpeB expression from indicated HKU16 strains. The molecular mass of each protein (kDa) is indicated to the right. Protein levels of the 40-kDa zymogen form (proSpeB) and 28-kDa mature form of SpeB (mSpeB) are shown as loading control. **(b)** Individual ‘humanized’ B6 mice that express HLA-DR4, HLA-DQ8 and CD4 were nasally inoculated with  $\sim 1 \times 10^8$  bacterial colony forming units (CFU) with indicated HKU16 strains and nasopharyngeal CFUs were assessed at 48 h post-infection. Data for wildtype HKU16 and HKU16 $\Delta$ slo were taken from Figure 4d. Each symbol represents CFUs from an individual mouse ( $n \geq 10$ ). Presented is the

geometric mean with 95% confidence interval. Significance was calculated using the Kruskal-Wallis test with the Dunn's multiple comparisons post-hoc test against the HKU16 control group (\*\* $p=0.0205$  for HKU16 $\Delta slo$ , \*\* $p=0.0097$  for HKU16 $\Delta slo/speC/spd1$ , and \*\* $p=0.003$  for HKU16 $\Delta slo/ssa/speC/spd1++$ ). HKU16 $\Delta slo/speC/spd1$  and HKU16 $\Delta slo/ssa/speC/spd1$  showed no significant difference in colonization fitness compared to HKU16 $\Delta slo$ . Source data are provided as a Source Data file.

**Supplementary Table 1:** List of bacterial strains, plasmids and primers used in this study.

| Bacterial strains                 | Description                                                                                     | Reference/Source |
|-----------------------------------|-------------------------------------------------------------------------------------------------|------------------|
| <b><i>E. coli</i></b>             |                                                                                                 |                  |
| MC1061                            | Laboratory cloning strain                                                                       | 6                |
| XL1-blue                          | Laboratory cloning strain                                                                       | Stratagene       |
| BL21(DE3)                         | Laboratory expression strain                                                                    | Stratagene       |
| <b><i>S. pyogenes</i></b>         |                                                                                                 |                  |
| HKU16                             | Hong Kong <i>S. pyogenes emm12</i> scarlet fever isolate                                        | 7                |
| HKU16 $\Delta$ ssa                | HKU16 $\Delta$ ssa isogenic mutant strain                                                       | This study       |
| HKU16 $\Delta$ ssa++              | HKU16 $\Delta$ ssa::ssa-complemented strain                                                     | This study       |
| HKU16 $\Delta$ ssa(C26S)          | HKU16 $\Delta$ ssa::ssa-complemented strain containing a C26S substitution                      | This study       |
| HKU16 $\Delta$ speC               | HKU16 $\Delta$ speC isogenic mutant strain                                                      | This study       |
| HKU16 $\Delta$ spd1               | HKU16 $\Delta$ spd1 isogenic mutant strain                                                      | This study       |
| HKU16 $\Delta$ spd1++             | HKU16 $\Delta$ spd1::spd1-complemented strain                                                   | This study       |
| HKU16 $\Delta$ ssa/speC           | HKU16 $\Delta$ ssa/speC double isogenic mutant strain                                           | This study       |
| HKU16 $\Delta$ ssa/spd1           | HKU16 $\Delta$ ssa/spd1 double isogenic mutant strain                                           | This study       |
| HKU16 $\Delta$ speC/spd1          | HKU16 $\Delta$ speC/spd1 double isogenic mutant strain                                          | This study       |
| HKU16 $\Delta$ ssa/speC/spd1      | HKU16 $\Delta$ ssa/speC/spd1 triple isogenic mutant strain                                      | This study       |
| HKU16 $\Delta$ ssa/speC/spd1++    | HKU16 $\Delta$ ssa/speC/spd1::ssa/speC/spd1 complemented strain                                 | This study       |
| HKU16 $\Delta$ slo                | HKU16 $\Delta$ slo isogenic mutant strain                                                       | This study       |
| HKU16 $\Delta$ slo/speC/spd1      | HKU16 $\Delta$ slo/speC/spd1 triple isogenic mutant strain                                      | This study       |
| HKU16 $\Delta$ slo/ssa/speC/spd1  | HKU16 $\Delta$ slo/ssa/speC/spd1 quadruple isogenic mutant strain                               | This study       |
| HKU16-GFP                         | HKU16 carrying <i>gfp</i> reporter pLZ12Km2-P23R:TA:GFP                                         | This study       |
| HKU16 $\Delta$ spd1-GFP           | HKU16 $\Delta$ spd1 carrying <i>gfp</i> reporter pLZ12Km2-P23R:TA:GFP                           | This study       |
| HKU16 $\Delta$ spd1++-GFP         | HKU16 $\Delta$ spd1::spd1-complemented strain carrying <i>gfp</i> reporter pLZ12Km2-P23R:TA:GFP | This study       |
| <b>Plasmids</b>                   |                                                                                                 |                  |
| <b><i>Expression plasmids</i></b> |                                                                                                 |                  |
| pET-28a                           | Expression plasmid::kanamycin <sup>R</sup>                                                      | Novagen          |
| pET-28a-Spd1                      | pET-28a+Spd1 expression construct                                                               | This study       |
| pET-28a-Spd1_N145A                | pET-28a+Spd1 expression construct containing a N145A substitution                               | This study       |
| pET-151                           | Directional TOPO expression plasmid, ampicillin <sup>R</sup>                                    | Invitrogen       |
| pET-151-SSA_N20D/N23A/Y89A/Y94A   | pET-151+SSA expression construct containing N20D/N23A/Y89A/Y94A substitutions                   | This study       |
| pET-15b-SLO                       | pET-15b+SLO expression construct                                                                | 8                |
| pET-15b-SLOmut                    | pET-15b+SLO expression construct containing P427L/W535A substitutions                           | 9                |
| pET-41a                           | Expression plasmid:: kanamycin <sup>R</sup>                                                     | Novagen          |
| pET-41a-SSA                       | pET-41a+SSA expression construct                                                                | This study       |
| pET-41a-SSA_C26S                  | pET-41a+SSA expression construct containing a C26S substitution                                 | This study       |

|                                  |                                                                    |            |
|----------------------------------|--------------------------------------------------------------------|------------|
| pET-41a-SpeC                     | pET-41a+SpeC expression construct                                  | 10         |
| <b>Mutagenesis plasmids</b>      |                                                                    |            |
| pLZts                            | Temperature-sensitive shuttle plasmid, spectinomycin <sup>R</sup>  | 11         |
| pLZts-ssa_KO                     | pLZts+ssa knockout construct                                       | This study |
| pLZts-ssa_complemented           | pLZts+ssa complementation construct                                | This study |
| pLZts-ssa_complemented_C26S      | pLZts+ssa complementation construct containing a C26S substitution | This study |
| pLZts-speC_KO                    | pLZts+speC knockout construct                                      | This study |
| pLZts-spd1_KO                    | pLZts+spd1 knockout construct                                      | This study |
| pLZts-spd1_complemented          | pLZts+spd1 complementation construct                               | This study |
| pLZts-ssa/speC_KO                | pLZts+ssa/speC double knockout construct                           | This study |
| pLZts-ssa/spd1_KO                | pLZts+ssa/spd1 double knockout construct                           | This study |
| pLZts-speC/spd1_KO               | pLZts+speC/spd1 double knockout construct                          | This study |
| pLZts-ssa/speC/spd1_KO           | pLZts+ssa/speC/spd1 triple knockout construct                      | This study |
| pLZts-ssa/speC/spd1_complemented | pLZts+ssa/speC/spd1 complementation construct                      | This study |
| pLZts-slo_KO                     | pLZts+slo knockout construct                                       | This study |
| <b>Reporter plasmids</b>         |                                                                    |            |
| pLZ12Km2-P23R-TA:GFP             | Plasmid-based GFP reporter system                                  | This study |

| Primer Name                                                                       | Sequence (5'-3')                                       |
|-----------------------------------------------------------------------------------|--------------------------------------------------------|
| <b>Primers for protein expression constructs</b>                                  |                                                        |
| <b>Spd1</b>                                                                       |                                                        |
| NdeI_spd1_SS_pET28a_F                                                             | taacatatgatgaaattatctaacaagcaagttgcttac                |
| HindIIIstop_spd1_pET28a_R                                                         | ctgaagctttattagtttttaggagtgccagttccattaaatag           |
| spd1_N145A_F                                                                      | cctgaataagcacctgtggctagccaggtgtcattgcc                 |
| spd1_N145A_R                                                                      | ggcaatgacagcctggctagccacaggtgcttattcagg                |
| <b>SSA</b>                                                                        |                                                        |
| NcoI_pET-41a_ssa_F                                                                | gcgcatggcaagtagtcagcctgaccctact                        |
| BamHI_pET-41a_ssa_R                                                               | taaggatcctatttttgtaaggtgaac                            |
| ssa_C26S_t154a_F                                                                  | ctacaaaatggtatcatataaacttctcaaattaccataacaccagt        |
| ssa_C26S_t154a_R                                                                  | actggtgttatggtaattgagaagtttatatgataaccattttgtag        |
| <b>SpeC</b>                                                                       |                                                        |
| NcoI_pET-41a_speC_F                                                               | cccatggcagactctaagaagacatttcgaatg                      |
| BamHI_pET-41a_speC_R                                                              | ccggatcctattttcaagataaataatcgaatg                      |
| <b>Primers for HKU16 gene chromosomal deletion and complementation constructs</b> |                                                        |
| <b>ssa</b>                                                                        |                                                        |
| ssa_KO-S-F                                                                        | ttgctgctcagactgatggcccatgctacaagggagagaatc             |
| ssa_KO-S-R                                                                        | gaacctctatgagtattcttattctttattcatttggtacctttatatttaaac |
| ssa_KO-AS-F                                                                       | aagaatactcatagaggttcaccttaccataaaaataaaagaaaataac      |
| ssa_KO-AS-R                                                                       | cataacctgaaggagatctcttaataacaaaattattctgaaaaagatatcg   |

**speC**

*speC\_KO-S-F*

*speC\_KO-S-R*

*speC\_KO-AS-F*

*speC\_KO-AS-R*

**spdI**

*spdI\_KO-S-F*

*spdI\_KO-S-R*

*spdI\_KO-AS-F*

*spdI\_KO-AS-R*

**slo**

*slo\_KO-S-F*

*slo\_KO-S-R*

*slo\_KO-AS-F*

*slo\_KO-AS-R*

**ssa/speC<sup>1</sup>**

*ssa\_speC\_KO-S-F*

*ssa\_speC\_KO-S-R*

*speC\_KO-S-R*

*ssa\_speC\_KO-AS-R*

**ssa/spdI<sup>1</sup>**

*ssa\_spdI\_KO-S-F*

*ssa\_spdI\_KO-S-R*

*ssa\_spdI\_KO-AS-F*

*ssa\_spdI\_KO-AS-R*

**speC/spdI**

*speC\_spdI\_KO-S-F*

*speC\_spdI\_KO-S-R*

*speC\_spdI\_KO-AS-F*

*ssa\_spdI\_KO-AS-R*

**ssa/speC/spdI<sup>1</sup>**

*ssa\_speC\_KO-S-F*

*speC\_spdI\_KO-S-R*

*speC\_spdI\_KO-AS-F*

*ssa\_spdI\_KO-AS-R*

**Primers for quantitative real time PCR**

qRT-PCR-*gyrA*-F

qRT-PCR-*gyrA*-R

qRT-PCR-*ssa*-F

ttggtcgtcagactgatgggccccactaaaataaattatgaccctg  
talcgaaatggtgatgatgtaactttttcatttttc  
catcatcaaacatttcgatattatctgaaaataattc  
cataacctgaaggaagatctggttgatattacaactaataaaaaacaag

ttggtcgtcagactgatgggccccacaaaaagaaccttaatatgg  
cagttccattgacctttggttagataattc  
acaaaaggcaaatggaactgccactcctaaaaac  
cataacctgaaggaagatcttttaagtcaatttcctggaaagttac

ttggtcgtcagactgatgggcccggtagaccataaaaaagtaac  
tcgaaccatattttgtagacatgctctc  
ctacaaaaaatatggttcgattactataagtag  
cataacctgaaggaagatctgagattccagccttcattataac

ttggtcgtcagactgatgggcccattcataggataatcacactag  
taacatcatcaaacatttcgatattatctgaaaataattc  
talcgaaatggtgatgatgtaactttttcatttttc  
cataacctgaaggaagatctctaccttttcacatatccaac

ttggtcgtcagactgatgggcccctaaagtcaatttcctggaaagttac  
acaaaaggcaggaactgccactcctaaaaac  
tggcagttcctgacctttggttagataattc  
cataacctgaaggaagatctatcatttgctatcattgcc

ttggtcgtcagactgatgggcccctcaataattctccgtacgag  
acaaaaggcacatttcgatattatctgaaaataattc  
talcgaaatggtcctttggttagataattc  
cataacctgaaggaagatctatcatttgctatcattgcc

ttggtcgtcagactgatgggcccattcataggataatcacactag  
acaaaaggcacatttcgatattatctgaaaataattc  
talcgaaatggtcctttggttagataattc  
cataacctgaaggaagatctatcatttgctatcattgcc

cgacttgctgaacgcaaa  
gtcagcaatcaaggccaaca  
gctgaccctactccagaac

|                                 |                        |
|---------------------------------|------------------------|
| qRTPCR- <i>ssa</i> -R           | agctgacctgtggatcttaca  |
| qRTPCR- <i>speC</i> -F          | ccgaaatgtcttatgaggcctc |
| qRTPCR- <i>speC</i> -R          | agcaggecgtaattcctccat  |
| <b>Mouse genotyping primers</b> |                        |
| HLA-DR4-DQ8-F                   | tcccttgatgatgaagatgg   |
| HLA-DR4-DQ8-R                   | cagaggtaactgtgctcacg   |
| hCD4-F                          | ctttccagaaggcctccagca  |
| hCD4-R                          | ctctcatcaccaccaggttcac |

---

<sup>1</sup>HKU16Δ*ssa* genomic DNA served as template and HKU16Δ*ssa* was used for genetic manipulation.

## References

- 1 Loh, J. M. & Proft, T. Toxin-antitoxin-stabilized reporter plasmids for biophotonic imaging of group A *Streptococcus*. *Appl Microbiol Biotechnol* **97**, 9737-9745 (2013).
- 2 Ly, D. *et al.* Plasmin(ogen) acquisition by group A *Streptococcus* protects against C3b-mediated neutrophil killing. *J Innate Immun* **6**, 240-250 (2014).
- 3 Sundberg, E. & Jardetzky, T. S. Structural basis for HLA-DQ binding by the streptococcal superantigen SSA. *Nat Struct Biol* **6**, 123-129 (1999).
- 4 Lee, K. H., Wucherpfennig, K. W. & Wiley, D. C. Structure of a human insulin peptide-HLA-DQ8 complex and susceptibility to type 1 diabetes. *Nat Immunol* **2**, 501-507 (2001).
- 5 Jardetzky, T. S. *et al.* Three-dimensional structure of a human class II histocompatibility molecule complexed with superantigen. *Nature* **368**, 711-718 (1994).
- 6 Wertman, K. F., Wyman, A. R. & Botstein, D. Host/vector interactions which affect the viability of recombinant phage lambda clones. *Gene* **49**, 253-262 (1986).
- 7 Tse, H. *et al.* Molecular characterization of the 2011 Hong Kong scarlet fever outbreak. *J Infect Dis* **206**, 341-351 (2012)
- 8 Timmer, A. M. *et al.* Streptolysin O promotes group A *Streptococcus* immune evasion by accelerated macrophage apoptosis. *J Biol Chem* **284**, 862-871 (2009).
- 9 Rivera-Hernandez, T. *et al.* Differing efficacies of lead group A streptococcal vaccine candidates and full-length M protein in cutaneous and invasive disease models. *mBio* **7**, pii: e00618-16 (2016).
- 10 Kasper, K. J. *et al.* Bacterial superantigens promote acute nasopharyngeal infection by *Streptococcus pyogenes* in a human MHC Class II-dependent manner. *PLoS Pathog* **10**, e1004155-e1004155 (2014).

- 11 Barnett, T. C., Daw, J. N., Walker, M. J. & Brouwer, S. Genetic manipulation of group A *Streptococcus* – gene deletion by allelic replacement. *In: T. Proft and J. Loh (Ed) Group A Streptococcus: Methods and Protocols. Springer, Heidelberg., 59-69 (2020).*
